# Supplementary material for: Nurse-Led Nutrition Education in Secondary Prevention of Stable Coronary Artery Disease: Cross-Sectional Study
Source: Research Square preprint supplement (doi:10.21203/rs.3.rs-8650781/v1), 2026-02-23
Supplement: Supplementary file 1 [file 66a730ca8cded194049b0ba4.doc]

**University of South Bohemia in České Budějovice, Faculty of Health and Social Studies**

**JIHOČESKÁ UNIVERZITA V ČESKÝCH BUDĚJOVICÍCH, ZDRAVOTNĚ SOCIÁLNÍ FAKULTA**

**Grant project NU23-09-00369 – Complex Nurse-Coordinated Education at Stable Ischemic Heart Disease, financed by the** **Czech** **Agency for Health Care Research**

**Faculty of Health and Social Studies of the University of South Bohemia, in České Budějovice**

**SURVEY OF OPINIONS OF NURSE-COORDINATED EDUCATIONAL ACTIVITIES IN COMPLEX CARE OF PATIENTS WITH STABLE ISCHEMIC HEART DISEASE**

Dear nurse,

We apply to you for cooperation. Currently, a representative study is supported by the Ministry of Health of the Czech Republic and the Agency for Health Care Research. The study's goal is, among others, to describe the health-educational interventions in cardiology. Based on the identified nurses' opinions, this study should help develop an optimal model for implementing health-educational interventions in patients undergoing a revascularization cardiac intervention.

We would like to invite you to participate in the study and answer the questions in this questionnaire.

**THE STUDY IS ANONYMOUS, NEVER GIVE YOUR NAME!**

All the information obtained will be treated in accordance with Act 101/2000 of the unabbreviated Code, relating to the protection of personal data. The study's results will be summarized, and the press will inform you.

I appreciate your cooperation

March 2023

Investigators

IF NOT MENTIONED OTHERWISE, CIRCLE JUST ONE ANSWER

**0. REGION (do not fill in) ……………**

1. **Sex:**
   1. man
   2. woman
2. **Your age (give the number of years): …………………………………………………………**
3. **Your highest achieved education:**
4. Secondary nursing school
5. Higher professional education (diploma Nurse)
6. Academic education – bachelor’s degree
7. Academic education - master’s degree
8. Others – specify ………………………………………………………………………
9. **Have you got any specialized education?**
10. yeas
11. no - ˃ switch to question **5**

**4.1. If you have, which specialization do you have? Please, specify** ……………………………………………

1. **Number of years of practical experience in healthcare:**
2. Up to 2 years
3. 2 – 5 years
4. 6 – 10 years
5. 11 years and more
6. Where do you work? *(More options can be circled*)
7. University hospital
8. Regional hospital
9. District hospital
10. Municipal hospital
11. Private hospital
12. Military hospital
13. Others …………………………………………………………….
14. **Have you undergone any other education (course, seminar, training) focused on education on modifiable IHD risk factors?**
    1. yes
    2. no ˃  **switch to question. 10**

3) I don’t know

1. The education you have undergone in modifiable IHD risk factors was focused: *(More options can be circled*)
   1. Rational nutrition
   2. Exercise
   3. Psycho-social factors – stress, type of the patient`s behavior
   4. Cessation of smoking
   5. Health-educational methods in patient education

1. **Have you used the information obtained in the training on the education on the modifiable IHD risk factors** **in the care of your patients?**
2. yes
3. No
4. I can’t judge

**10. Are patients educated on nutrition by a doctor at your facility?**

1) yes

2) no **> Switch to question 11**

3) I don’t know  **>** **Switch to question 11**

**10.1 If patients are educated on nutrition by a doctor, give the time of the education in minutes**

The education by a doctor usually takes ……. minutes

**11. Are patients educated on nutrition by a nurse at your facility?**

1) yes

2) No **> Switch to question 12**

3) I don’t know **>** **Switch to question 12**

**11.1 If patients are educated on nutrition by a nurse at your facility, give the time of the education in minutes:**

The education by a nurse usually takes……. minutes

**12. Are patients educated on nutrition by somebody else at your facility?**

1) yes

2) no **> Switch to question 13**

3) I don’t know **>** **Switch to question 13**

**12.1 If patients are educated on nutrition by somebody else at your facility, specify the following:**

patients are educated by ………………………………

**12.2 If patients are educated on nutrition by somebody else at your facility, give the time of the education in minutes:**

The education by somebody else usually takes ……. minutes

**13. Are patients educated on slimming by a doctor at your facility?**

1) yes

2) no **> Switch to question 14**

3) I don’t know **>** **Switch to question 14**

**13.1 If patients are educated on slimming by a doctor, give the time of the education in minutes:**

The education by a doctor usually takes ……. minutes

**14. Are patients educated on slimming by a nurse at your facility?**

1) yes

2) no **> Switch to question 15**

3) I don’t know **>** **Switch to question 15**

**14.1 If patients are educated on slimming by a nurse at your facility, give the time of the education in minutes:**

The education by a nurse usually takes……. minutes

**15. Are patients educated on slimming by somebody else at your facility?**

1) yes

2) no **> Switch to question 16**

3) I don’t know **>** **Switch to question 16**

**15.1 If patients are educated on slimming by somebody else at your facility, specify:**

patients are educated by ………………………………

**15.2 If patients are educated on slimming by somebody else at your facility, give the time of the education in minutes:**

The education by somebody else usually takes ……. minutes

**16. Are patients educated on exercise by a doctor at your facility?**

1) yes

2) no **> Switch to question 17**

3) I don’t know **>** **Switch to question 17**

**16.1 If patients are educated on exercise by a doctor at your facility, give the time of the education in minutes:**

The education by a doctor usually takes ……. minutes

**17. Are patients educated on exercise by a nurse at your facility?**

1) yes

2) no **> Switch to question 18**

3) I don’t remember **>** **Switch to question 18**

**17.1 If patients are educated on exercise by a nurse at your facility, give the time of the education in minutes:**

The education by a nurse usually takes……. minutes

**18. Are patients educated on exercise by somebody else at your facility?**

1) yes

2) no **> Switch to question 19**

3) I don’t know **>** **Switch to question 19**

**18.1 If patients are educated on exercise by somebody else at your facility, specify the following:**

patients are educated by ………………………………

**18.2 If patients are educated on exercise by somebody else at your facility, give the time of education in minutes:**

The education by somebody else usually takes ……. minutes

**19. Are patients educated on smoking cessation by a doctor at your facility?**

1) yes

2) no **> Switch to question 20**

3) I don’t know **>** **Switch to question 20**

**19.1 If patients are educated on the cessation of smoking by a doctor, give the time of the education in minutes:**

The education by a doctor usually takes ……. minutes

**20. Are patients educated on smoking cessation by a nurse at your facility?**

1) yes

2) no **> Switch to question 21**

3) I don’t know **>** **Switch to question 21**

**20.1 If patients are educated on the cessation of smoking by a nurse, give the time of the education in minutes:**

**:**

The education by a nurse usually takes……. minutes

**21. Are patients educated on cessation of smoking by somebody else?**

1) yes

2) no **> Switch to question 22**

3) I don’t know **>** **Switch to question 22**

**21.1 If patients are educated on the cessation of smoking by somebody else at your facility, specify:**

Patients are educated by ………………………………

**21.2 If patients are educated on the cessation of smoking by somebody else, give the time of the education in minutes:**

The education by somebody else usually takes ……. minutes

**22. Are patients educated on stress reduction by a doctor at your facility?**

1) yes

2) no **> Switch to question 23**

3) I don’t know **>** **Switch to question 23**

**22.1 If patients are educated on stress reduction by a doctor, give the time of the education in minutes:**

The education by a doctor usually takes ………. minutes

**23. Are patients educated on stress reduction by a nurse at your facility?**

1) yes

2) no **> Switch to question 24**

3) I don’t know **>** **Switch to question 24**

**23.1 If patients are educated on stress reduction by a nurse, give the time of the education in minutes:**

The education by a nurse usually takes……. minutes

**24. Is somebody else at your facility educating patients on stress reduction?**

1) yes

2) no **> Switch to question 25**

3) I don’t know **>** **Switch to question 25**

**24.1 If patients are educated on stress reduction by somebody else at your facility, specify:**

patients are educated by ………………………………

**24.2 If patients are educated on stress reduction by somebody else at your facility, give the time of education in minutes:**

The education by somebody else usually takes ……. minutes

**25. Are patients educated on undesirable drug effects by a doctor at your facility?**

1) yes

2) no **> Switch to question 26**

3) I don’t know **>** **Switch to question 26**

**25.1 If patients are educated on undesirable drug effects by a doctor at your facility,**

**give the time of the education in minutes:**

The education by a doctor usually takes ……. minutes

**26. Are patients educated on undesirable drug effects by a nurse at your facility?**

1) yes

2) no **> Switch to question 27**

3) I don’t know **>** **Switch to question 27**

**26.1 If patients are educated on undesirable drug effects by a nurse at your facility,**

**give the time of the education in minutes:**

The education by a nurse usually takes……. minutes

**27. Are patients educated on undesirable drug effects by somebody else at your facility?**

1) yes

2) no **> Switch to question 28**

3) I don’t know **>** **Switch to question 28**

**27.1 If patients are educated on undesirable drug effects by somebody else at your facility, specify the following:**

patients are educated by ………………………………

**27.2 If patients are educated about undesirable drug effects by somebody else,**

**give the time of the education in minutes:**

The education by somebody else usually takes ……. minutes

1. **Do you find the time you spend on education on modifiable IHD risk factors sufficient?**
2. Completely sufficient
3. Difficult to decide
4. Rather insufficient
5. Completely insufficient

.

1. **Which area of modifiable risk factors are, in your opinion, patients most interested in? *(Tick one option in each line)***

|  | **1**  **definitely yes** | **2**  **yes** | **3**  **Hard to decide** | **4**  **no** | **5**  **definitely not** |
| --- | --- | --- | --- | --- | --- |
| **1) Change in Nutrition** | 1 | 2 | 3 | 4 | 5 |
| 1. **Weight reduction/ Slimming** | 1 | 2 | 3 | 4 | 5 |
| **3) Exercise** | 1 | 2 | 3 | 4 | 5 |
| **4) Cessation of smoking** | 1 | 2 | 3 | 4 | 5 |
| **5) Stress reduction** | 1 | 2 | 3 | 4 | 5 |
| **6) Knowledge of undesirable drug effects** | 1 | 2 | 3 | 4 | 5 |

1. **Which of the modifiable risk factors is difficult for your patients to reduce? *In each line, tick one option.***

|  | **1**  **definitely yes** | **2**  **yes** | **3**  **no** | **4**  **definitely not** | **5**  **hard to decide** |
| --- | --- | --- | --- | --- | --- |
| **1) Change in Nutrition** | 1 | 2 | 3 | 4 | 5 |
| **2) Weight reduction/slimming** | 1 | 2 | 3 | 4 | 5 |
| **3) Exercise** | 1 | 2 | 3 | 4 | 5 |
| **4) Cessation of smoking** | 1 | 2 | 3 | 4 | 5 |
| **5) Stress reduction** | 1 | 2 | 3 | 4 | 5 |
| **6) Knowledge of undesirable drug effects** | 1 | 2 | 3 | 4 | 5 |

1. **Which motivation elements do you use in patient education? (*In each line, tick one option.***

|  | **1**  **always** | **2**  **often** | **3**  **occasionally** | **4**  **seldom** | **5**  **never** |
| --- | --- | --- | --- | --- | --- |
| **1) Open-ended questions** | 1 | 2 | 3 | 4 | 5 |
| **2) Summary – reflection** | 1 | 2 | 3 | 4 | 5 |
| **3) Offer of options** | 1 | 2 | 3 | 4 | 5 |
| **4) Recognition, praise** | 1 | 2 | 3 | 4 | 5 |
| **5) Advice** | 1 | 2 | 3 | 4 | 5 |
| **6) Active listening** | 1 | 2 | 3 | 4 | 5 |

1. **Which of the following phases of the educational process do you use at work?**

|  | **1**  **always** | **2**  **often** | **3**  **occasionally** | **4**  **seldom** | **5**  **never** |
| --- | --- | --- | --- | --- | --- |
| **1) I evaluate the educational needs of each patient.** | 1 | 2 | 3 | 4 | 5 |
| **2)**  **I am interested in patients' employment (what they do during the day and whether they do any physical or mental work).** | 1 | 2 | 3 | 4 | 5 |
| **3) I take an interest in the patients` socio-economic situation.** | 1 | 2 | 3 | 4 | 5 |
| **4) I take an interest in the patient's lifestyle.** | 1 | 2 | 3 | 4 | 5 |
| **5) I am interested in how the patients` illness influences their lives.** | 1 | 2 | 3 | 4 | 5 |
| **6) I keep records of patients` progress in lifestyle change (e.g., weight reduction, smoking cessation, etc.).** | 1 | 2 | 3 | 4 | 5 |
| **7) I determine the goal of education.** | 1 | 2 | 3 | 4 | 5 |
| 1. **Which educational methods do you use?** | | | | | |
|  | **1**  **always** | **2**  **Often** | **3**  **occasionally** | **4**  **seldom** | **5**  **Never** |
| 1. **Dialog** | 1 | 2 | 3 | 4 | 5 |
| 1. **Printed matters** | 1 | 2 | 3 | 4 | 5 |
| 1. **Internet pages (professional – e.g., Czech Cardiologic Society, etc.)** | 1 | 2 | 3 | 4 | 5 |
| 1. **Counselling on the phone** | 1 | 2 | 3 | 4 | 5 |
| 1. **Online/skype counseling** | 1 | 2 | 3 | 4 | 5 |
| 1. **Skill training** | 1 | 2 | 3 | 4 | 5 |

1. **Do you evaluate the effect of education?**

1) always

2) often

3) occasionally

4) seldom

5) never

1. **Do you keep records of education?**

1)always

2) often

3) occasionally

4) seldom

5) never

1. **Do you offer the possibility of using supportive groups during patient education?**
2. yes
3. No
4. There are no supportive groups in the vicinity.
5. **Do you find supportive groups beneficial for patient education?**
6. yes
7. No
8. only some of them
9. I don’t know
10. **How often do the below-mentioned professionals participate in direct patient education at your clinic?**

|  | **1**  **always** | **2**  **often** | **3**  **occasionally** | **4**  **seldom** | **5**  **never** |
| --- | --- | --- | --- | --- | --- |
| **1) nursed** | 1 | 2 | 3 | 4 | 5 |
| **2) attending physician** | 1 | 2 | 3 | 4 | 5 |
| **3) nutritional therapist** | 1 | 2 | 3 | 4 | 5 |
| **4) physiotherapist** | 1 | 2 | 3 | 4 | 5 |
| **5) psychologist** | 1 | 2 | 3 | 4 | 5 |
| **6) pharmacist** | 1 | 2 | 3 | 4 | 5 |
| **7) social worker** | 1 | 2 | 3 | 4 | 5 |
| **8) others (specify) …………….** | 1 | 2 | 3 | 4 | 5 |

1. **Should health insurance agencies pay for the independent nursing intervention “Nurse-Led Education”?**
2. yes
3. No
4. I don’t know
5. **How effective are the current interventions in changing lifestyles? *In each line, tick just one option.***

|  | **1**  **always** | **2**  **often** | **3**  **occasionally** | **4**  **seldom** | **5**  **never** | **6**  **I don't know** |
| --- | --- | --- | --- | --- | --- | --- |
| **1) Change in Nutrition** | 1 | 2 | 3 | 4 | 5 | 6 |
| **2) Weight reduction** | 1 | 2 | 3 | 4 | 5 | 6 |
| **3) Exercise** | 1 | 2 | 3 | 4 | 5 | 6 |
| **4) Cessation of smoking** | 1 | 2 | 3 | 4 | 5 | 6 |
| **5) Stress reduction** | 1 | 2 | 3 | 4 | 5 | 6 |
| **6) Undesirable drug effects** | 1 | 2 | 3 | 4 | 5 | 6 |

1. **What are, in your opinion, the obstacles to implementing health-educative activities? *(More answers can be ticked.)***
   1. Human resources (shortage of staff, overload)
   2. Staff education (lack of knowledge of the topic)
   3. Staff motivation (burnout syndrome, unwillingness)
   4. Patients` motivation, lack of interest, illness)
   5. Culture of the environment (missing quiet background, insufficient support on the part of the management)
   6. Economic reasons (no payment for the education)
   7. Others, specify ………………………………………………………………….
2. **Please, describe your experience (opinions) relating to the prevention in cardiology.**

**………………………………………………………………………………………………………………………………………………………………………………………………………………………………..………………………………………………………………………………………………………………….…………………………………………………………………………………………………………………………………………………………………………………..**
